# Supplementary material
Source: publisher figshare collection journal article supplement (https://future-science-group.figshare.com/ndownloader/files/28660833)

**Supplementary Figure 1.**


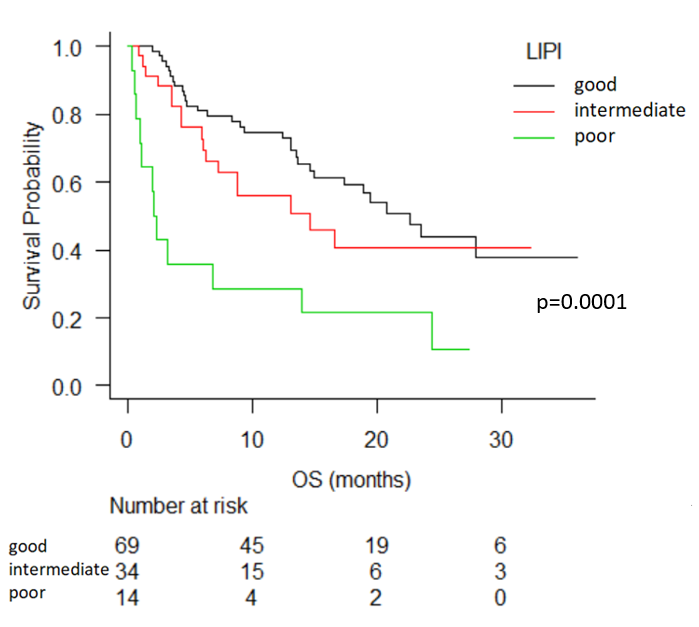

Supplement: Supplementary file 1 [file 28660833]
